# Supplementary material for: Quinolone and Organophosphorus Insecticide Residues in Bivalves and Their Associated Risks in Taiwan
Source: PubMed Central journal article supplement (PMC7465073; doi:10.3390/molecules25163636), 2020-08-10
Supplement: molecules-25-03636-s001.pdf [file molecules-25-03636-s001.pdf]

Article

# Quinolone and Organophosphorus Insecticide Residues in Bivalves and Their Associated Risks in Taiwan

Ching-Feng Wu <sup>1,†</sup>, Ching-Hung Chen <sup>2,†</sup>, Ching-Yang Wu <sup>1</sup>, Chen-Si Lin <sup>3</sup>, Yao-Chi Su <sup>4</sup>, Ching-Fen Wu <sup>4</sup>, Hsiao-Pei Tsai <sup>5,6</sup>, Pei-Shan Fan <sup>4</sup>, Chang-Hui Yeh <sup>4</sup>, Wei-Cheng Yang <sup>3,\*</sup> and Geng-Ruei Chang <sup>4,5,6,\*</sup>

<sup>1</sup> Division of Thoracic and Cardiovascular Surgery, Department of Surgery, Chang Gung University, Chang Gung Memorial Hospital, Linkou, 5 Fuxing Street., Guishan District, Taoyuan 33305, Taiwan; maple.bt88@gmail.com (C.F.W.); wu.chingyang@gmail.com (C.Y.W.)

<sup>2</sup> Department of Anesthesiology, Show Chwan Memorial Hospital, 1 Section, 542 Chung-Shan Road, Changhua 50008, Taiwan; consideration00@gmail.com (C.H.C.)

<sup>3</sup> Department of Veterinary Medicine, School of Veterinary Medicine, National Taiwan University, 4 Section, 1 Roosevelt Road, Taipei 10617, Taiwan; cslin100@ntu.edu.tw (C.S.L.); yangweicheng@ntu.edu.tw (W.C.Y.)

<sup>4</sup> Department of Veterinary Medicine, National Chiayi University, 580 Xinmin Road, Chiayi 60054, Taiwan; shu@mail.ncyu.edu.tw (Y.C.S.); cfwu@mail.ncyu.edu.tw (C.F.W.); babybelle349@gmail.com (P.S.F.); grchang@mail.ncyu.edu.tw (G.R.C.)

<sup>5</sup> Veterinary Teaching Hospital, National Chiayi University, 580 Xinmin Road, Chiayi 60054, Taiwan; tsabelle@mail.ncyu.edu.tw (H.P.T.); (G.R.C.)

<sup>6</sup> Ph.D. Program of Agriculture Science, National Chiayi University, 300 Syuefu Road, Chiayi 60004 and Taiwan

\* Correspondence: [yangweicheng@ntu.edu.tw](mailto:yangweicheng@ntu.edu.tw) (W.C.Y.), [grchang@mail.ncyu.edu.tw](mailto:grchang@mail.ncyu.edu.tw) (G.R.C.); Tel.: +886-2-33663871 (W.C.Y.), +886-5-2732946 (G.R.C.)

† These authors contributed equally to this work.

## Supplementary Materials

**Table S1.** Recovery, repeatability, and limit of quantification of quinolones spiked into bivalve samples

| Analyte       | Spiked level<br>(ng/g) | Hard clam    |         | Freshwater clam |         | LOQ<br>(ng/g) |
|---------------|------------------------|--------------|---------|-----------------|---------|---------------|
|               |                        | Recovery (%) | RSD (%) | Recovery (%)    | RSD (%) |               |
| Ciprofloxacin | 5                      | 98.52        | 5.27    | 97.36           | 3.71    | 5             |
|               | 25                     | 99.89        | 6.72    | 98.59           | 5.32    |               |
| Danofloxacin  | 5                      | 98.15        | 6.17    | 99.36           | 5.42    | 5             |
|               | 25                     | 99.47        | 7.96    | 99.58           | 8.35    |               |
| Difloxacin    | 5                      | 96.38        | 8.32    | 97.21           | 7.41    | 5             |
|               | 25                     | 98.71        | 8.95    | 98.56           | 8.23    |               |
| Enrofloxacin  | 5                      | 100.52       | 2.83    | 99.17           | 10.15   | 5             |
|               | 25                     | 102.57       | 3.58    | 100.46          | 9.81    |               |
| Fleroxacin    | 5                      | 99.52        | 7.83    | 98.62           | 6.72    | 5             |

---

|               |    |        |      |        |       |   |
|---------------|----|--------|------|--------|-------|---|
|               | 25 | 100.65 | 6.56 | 99.86  | 8.29  |   |
| Flumequine    | 5  | 98.56  | 3.82 | 99.23  | 9.21  | 5 |
|               | 25 | 99.16  | 5.61 | 100.72 | 8.53  |   |
| Marbofloxacin | 5  | 96.35  | 8.57 | 95.47  | 9.36  | 5 |
|               | 25 | 97.68  | 9.13 | 98.72  | 11.35 |   |
| Sarafloxacin  | 5  | 99.62  | 5.73 | 98.48  | 7.73  | 5 |
|               | 25 | 100.76 | 9.25 | 99.39  | 8.39  |   |

---

**Table S2.** Recovery, repeatability, and limit of quantification of organophosphorus insecticides spiked into bivalve samples

| Analyte       | Spikedlevel<br>(ng/g) | Hard clam    |         | Freshwater clam |         | LOQ<br>(ng/g) |
|---------------|-----------------------|--------------|---------|-----------------|---------|---------------|
|               |                       | Recovery (%) | RSD (%) | Recovery (%)    | RSD (%) |               |
| Fenamiphos    | 5                     | 98.52        | 5.27    | 97.36           | 3.71    | 5             |
|               | 25                    | 99.89        | 6.72    | 98.59           | 5.32    |               |
| Fenthion      | 5                     | 98.15        | 6.17    | 99.36           | 5.42    | 5             |
|               | 25                    | 99.47        | 7.96    | 99.58           | 8.35    |               |
| Methamidophos | 5                     | 96.38        | 8.32    | 97.21           | 7.41    | 5             |
|               | 25                    | 98.71        | 8.95    | 98.56           | 8.23    |               |
| Phoxim        | 5                     | 100.52       | 2.83    | 99.17           | 10.15   | 5             |
|               | 25                    | 102.57       | 3.58    | 100.46          | 9.81    |               |
| Profenophos   | 5                     | 99.52        | 7.83    | 98.62           | 6.72    | 5             |
|               | 25                    | 100.65       | 6.56    | 99.86           | 8.29    |               |
| Trichlorfon   | 5                     | 98.56        | 3.82    | 99.23           | 9.21    | 5             |
|               | 25                    | 99.16        | 5.61    | 100.72          | 8.53    |               |
| Chlorpyrifos  | 5                     | 96.35        | 8.57    | 95.47           | 9.36    | 5             |
|               | 25                    | 97.68        | 9.13    | 98.72           | 11.35   |               |
| Diazinon      | 5                     | 99.62        | 5.73    | 98.48           | 7.73    | 5             |
|               | 25                    | 100.76       | 9.25    | 99.39           | 8.39    |               |
| Fenitrothion  | 5                     | 103.31       | 7.68    | 105.06          | 6.53    | 5             |
|               | 25                    | 107.26       | 5.37    | 108.37          | 8.16    |               |
| Formothion    | 5                     | 105.72       | 6.51    | 102.61          | 5.32    | 5             |
|               | 25                    | 108.61       | 9.82    | 104.37          | 7.85    |               |
| Malathion     | 5                     | 107.42       | 10.31   | 105.82          | 8.67    | 5             |
|               | 25                    | 113.56       | 12.67   | 108.35          | 10.23   |               |
| Triazophos    | 5                     | 112.32       | 8.27    | 108.32          | 7.35    | 5             |
|               | 25                    | 114.53       | 7.36    | 110.48          | 9.18    |               |

**Table S3.** MS/MS fragmentation conditions for LC-amenable 8 quinolones

| Analyte       | Retention Time | Quantification ion<br>(Collision energy) m/z (eV) | Identification ion<br>(Collision energy) m/z (eV) |
|---------------|----------------|---------------------------------------------------|---------------------------------------------------|
| Ciprofloxacin | 9.66±0.02      | 332→314 (8)                                       | 332→231 (11)                                      |
| Danofloxacin  | 10.37±0.02     | 358→340 (9)                                       | 358→283 (18)                                      |
| Difloxacin    | 11.13±0.02     | 400→356 (10)                                      | 400→299 (17)                                      |
| Enrofloxacin  | 10.21±0.02     | 360→316 (6)                                       | 360→245 (8)                                       |
| Fleroxacin    | 7.98±0.02      | 370→326 (25)                                      | 370→269 (19)                                      |
| Flumequine    | 15.93±0.02     | 262→244 (14)                                      | 262→202 (14)                                      |
| Marbofloxacin | 7.79±0.02      | 363→345 (17)                                      | 363→72 (26)                                       |
| Sarafloxacin  | 11.78±0.02     | 386→368 (12)                                      | 386→342 (16)                                      |

**Table S4.** MS/MS fragmentation conditions for LC- or GC-amenable 12 organophosphorus insecticides

| Analyte       | LC/GC | Retention Time | Quantification ion<br>(Collision energy) m/z (eV) | Identification ion<br>(Collision energy) m/z (eV) |
|---------------|-------|----------------|---------------------------------------------------|---------------------------------------------------|
| Fenamiphos    | LC    | 10.31±0.02     | 304→202 (37)                                      | 304→217 (24)                                      |
| Fenthion      | LC    | 10.84±0.02     | 279→169 (20)                                      | 279→247 (14)                                      |
| Methamidophos | LC    | 2.74±0.02      | 142→94 (14)                                       | 142→125 (13)                                      |
| Phoxim        | LC    | 10.99±0.02     | 299→129 (10)                                      | 299→153 (10)                                      |
| Profenophos   | LC    | 11.45±0.02     | 373→128 (55)                                      | 373→303 (19)                                      |
| Trichlorfon   | LC    | 4.34±0.02      | 257→79(28)                                        | 257→109 (18)                                      |
| Chlorpyrifos  | GC    | 10.45±0.02     | 314→258 (15)                                      | 314→286 (5)                                       |
| Diazinon      | GC    | 8.75±0.02      | 304→179 (15)                                      | 304→162 (5)                                       |
| Fenitrothion  | GC    | 10.16±0.02     | 277→109 (20)                                      | 277→260 (5)                                       |
| Formothion    | GC    | 9.33±0.02      | 224→125 (20)                                      | 224→155 (10)                                      |
| Malathion     | GC    | 10.26±0.02     | 173→127 (5)                                       | 173→99 (15)                                       |
| Triazophos    | GC    | 13.26±0.02     | 257→162 (5)                                       | 257→119 (30)                                      |

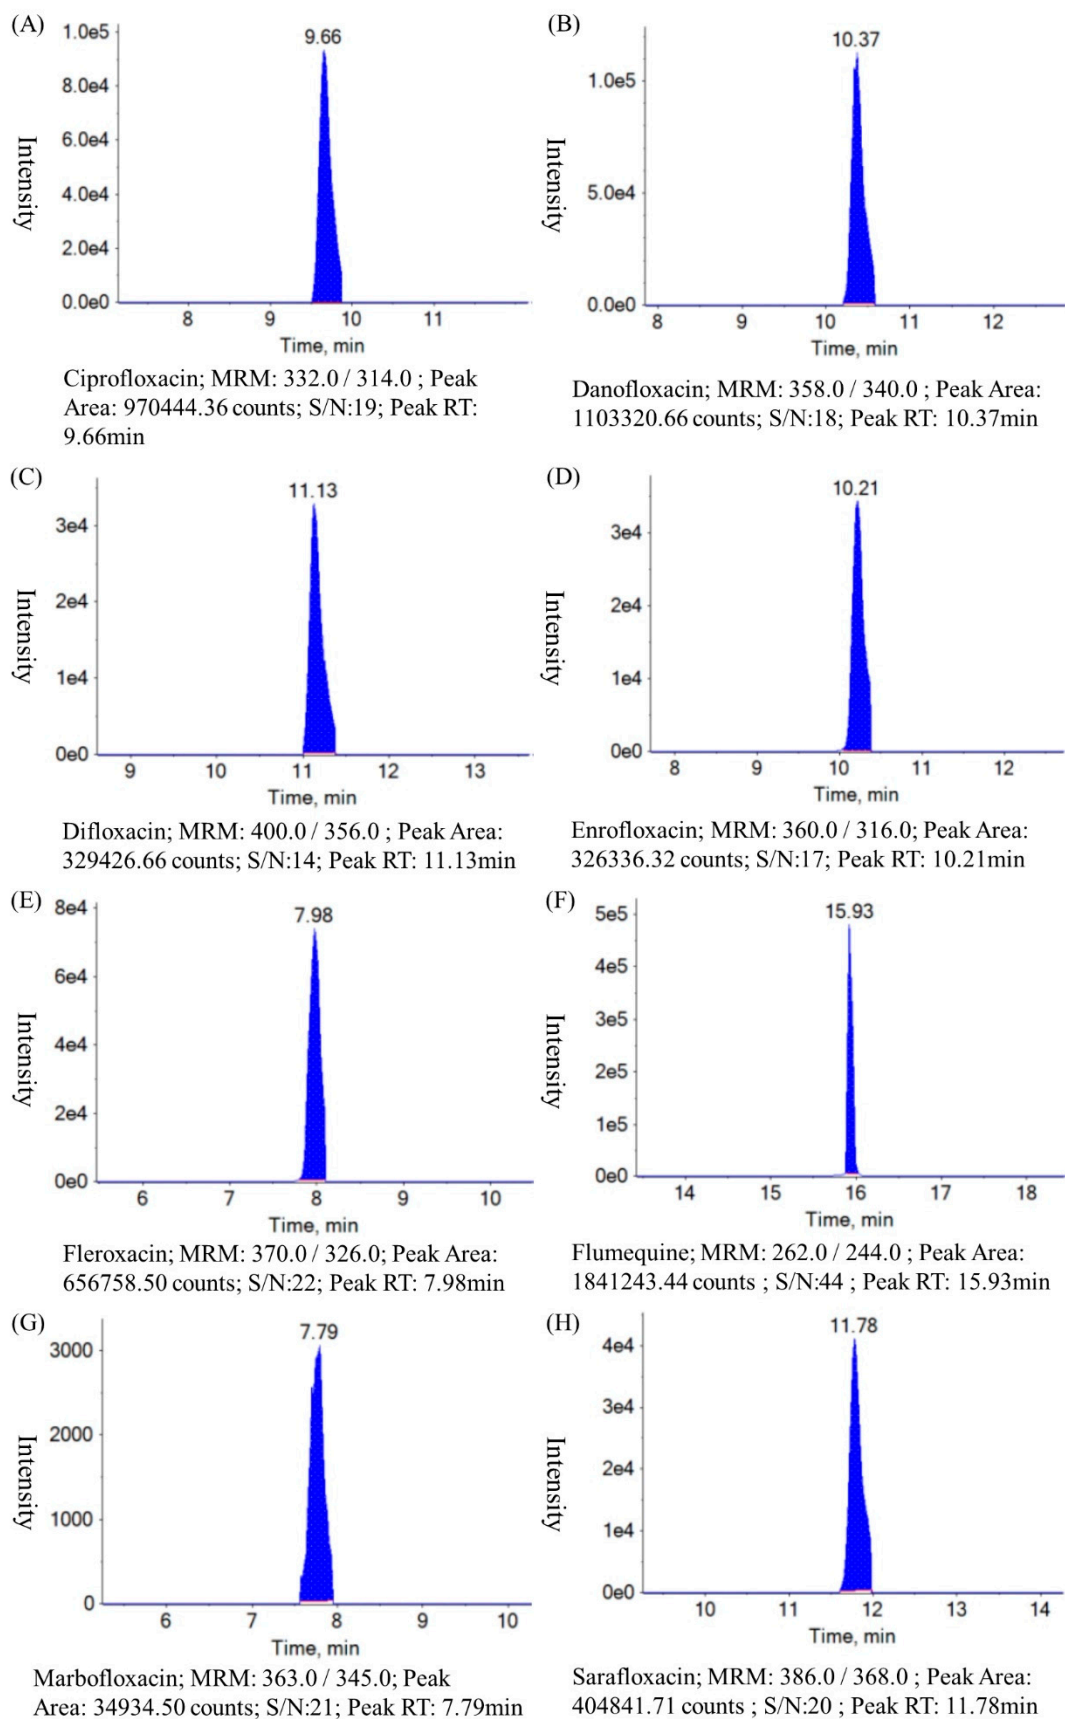

**Figure S1.** LC-MS/MS chromatogram of the detected quinolones at the quantification ion at LOQ (5 ng/g) in the bivalve samples.

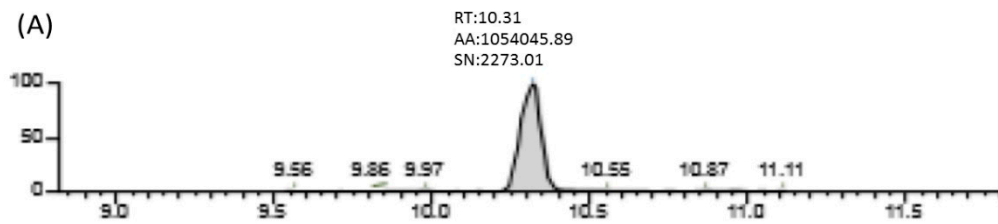

Fenamiphos; MRM: 304.0 / 202.0

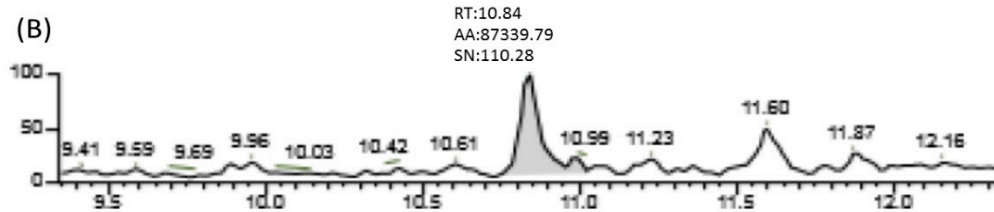

Fenthion; MRM: 279.0 / 169.0

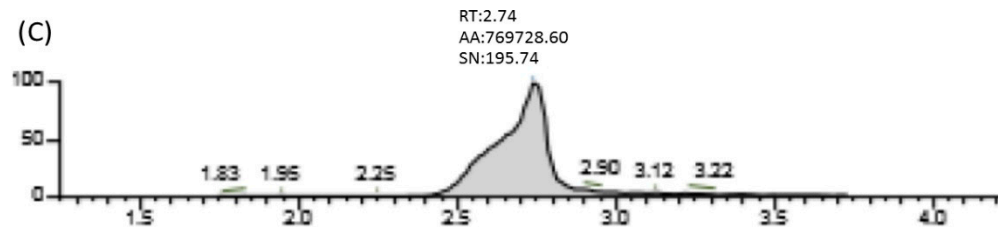

Methamidophos; MRM: 142.0 / 94.0

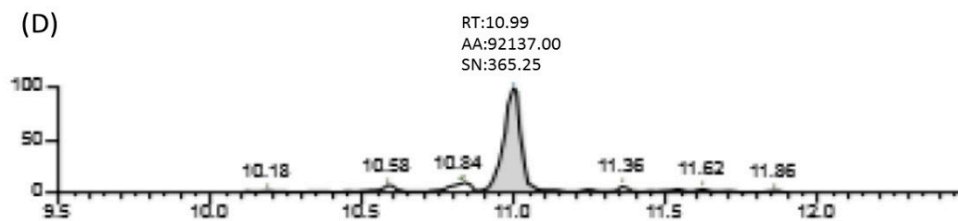

Phoxim; MRM: 299.0 / 129.0

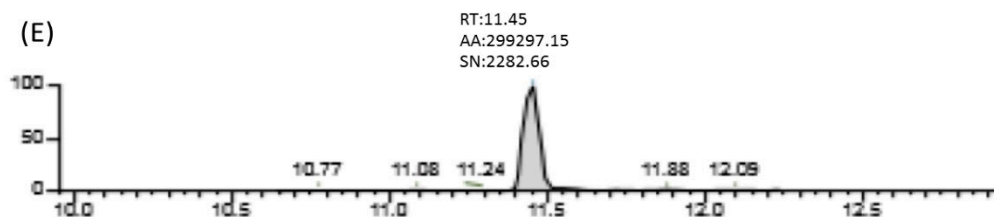

Profenophos; MRM: 373.0 / 128.0

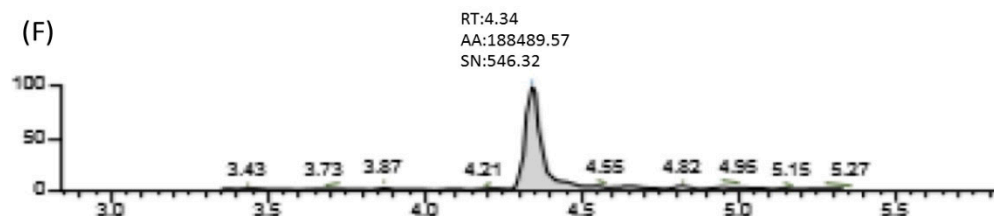

Trichlorfon; MRM: 257.0 / 79.0

**Figure S2.** LC-MS/MS chromatograms of the detected organophosphorus insecticide at the quantification ion at LOQ (5 ng/g) in the bivalve samples.

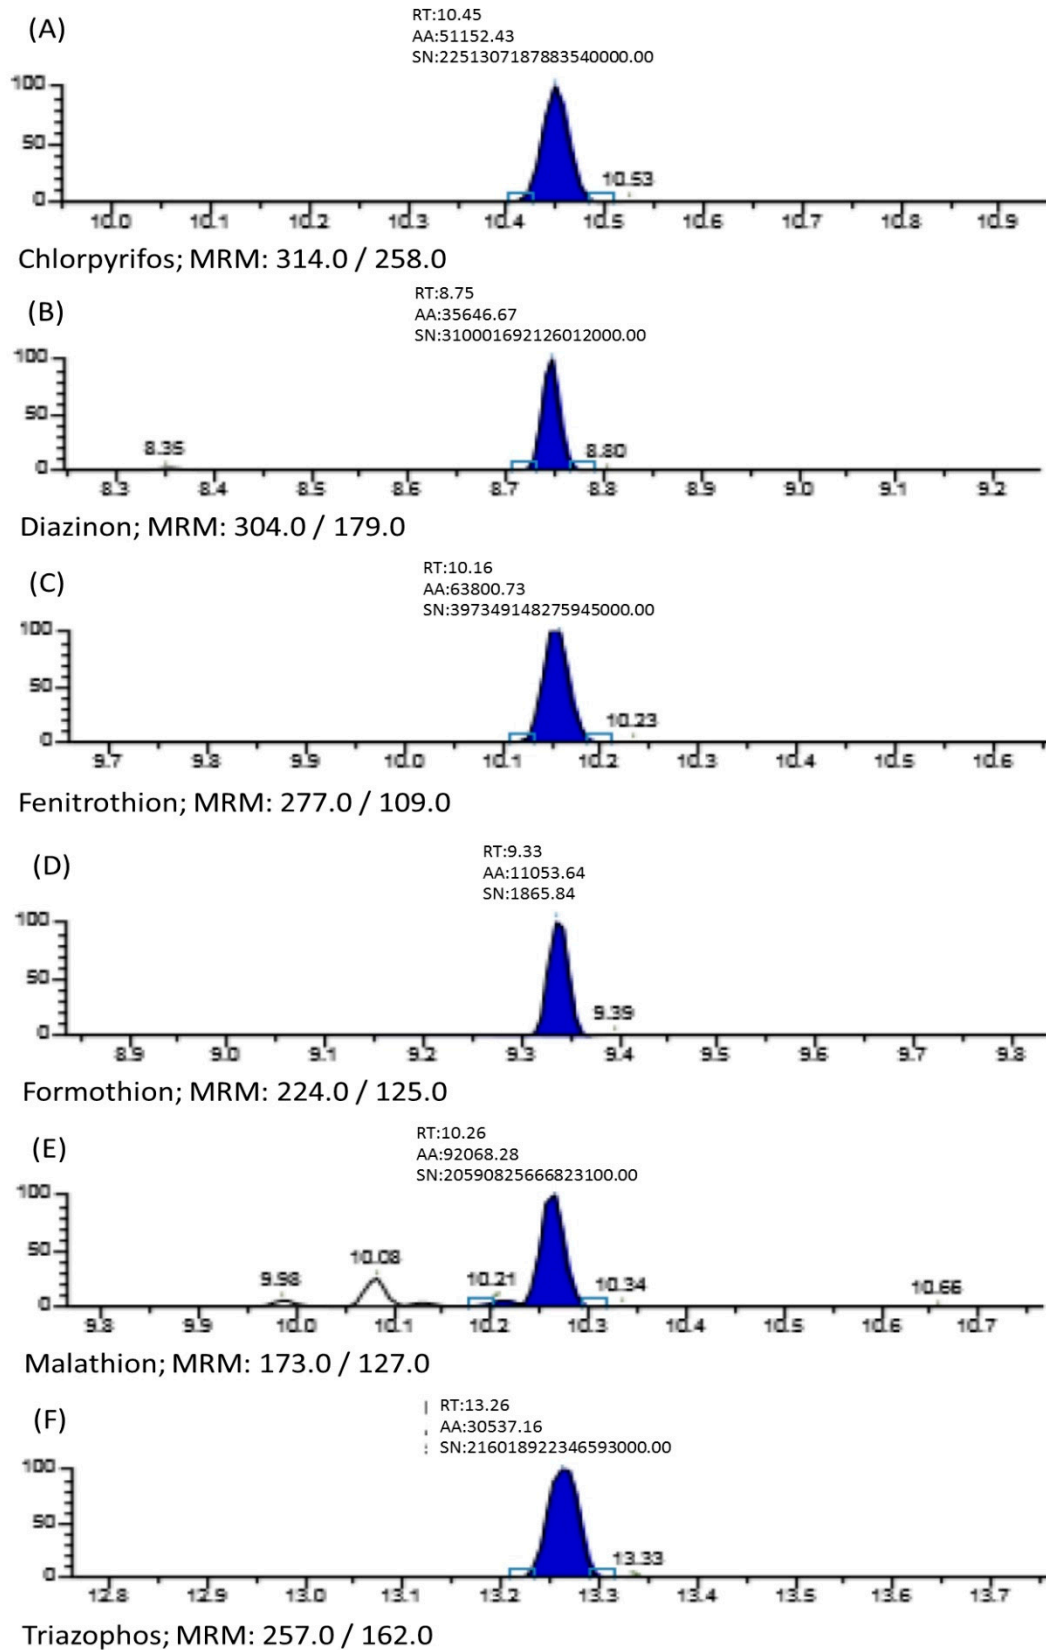

**Figure S3.** GC-MS/MS chromatograms of the detected organophosphorus insecticide at the quantification ion at LOQ (5 ng/g) in the bivalve samples.
